# Supplementary material
Source: Springer Nature journal article supplement (https://www.springermedizin.de/resource/supplementary/12906_2012_1304_MOESM13_ESM.pdf/9522416)

**A**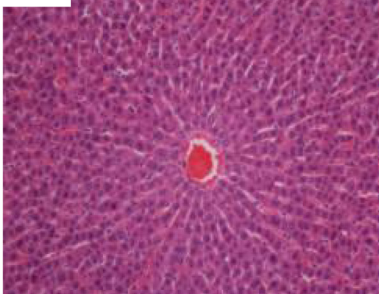**B**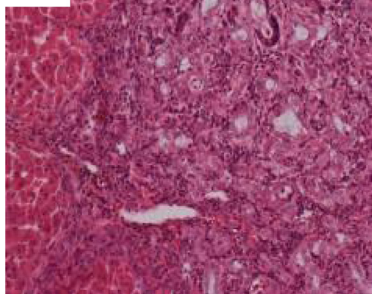**C**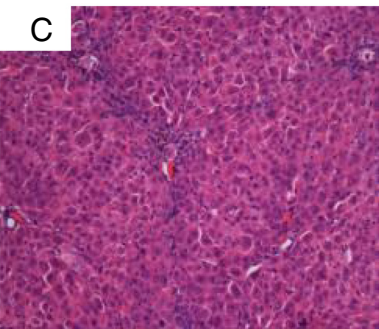**D**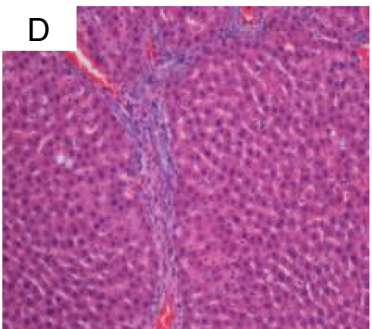**E**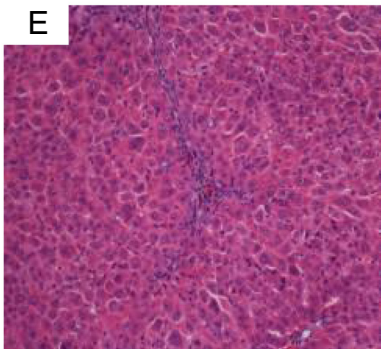

Supplement: MOESM13 [file 9522416]
